# Supplementary material for: Human IL6 enhances leptin action in mice
Source: Springer Nature journal article supplement (doi:10.1007/s00125-009-1580-8), 2009-11-09
Supplement: MOESM1 [file 8088840]

**Electronic supplementary material****ESM Table 1** Cytokine levels per animal group

| Cytokine               | Chow         |                           |               | HFD                       |                |
|------------------------|--------------|---------------------------|---------------|---------------------------|----------------|
|                        | Wild-type    | <i>hIL6</i> <sup>tg</sup> | Wild-type     | <i>hIL6</i> <sup>tg</sup> | <i>ob/ob</i>   |
| TNF $\alpha$ (pg/ml)   | ND           | ND                        | 8.5 $\pm$ 4   | ND                        | 1654 $\pm$ 321 |
| IL10 (pg/ml)           | ND           | ND                        | 100 $\pm$ 14  | ND                        | -              |
| INF $\gamma$ (pg/ml)   | ND           | ND                        | ND            | ND                        | 8 $\pm$ 2.5    |
| IL1 (pg/ml)            | ND           | ND                        | 86 $\pm$ 8.5  | ND                        | -              |
| MCP1 (pg/ml)           | 23 $\pm$ 5   | 16 $\pm$ 8                | 65 $\pm$ 45.5 | 19 $\pm$ 7.5              | 73 $\pm$ 16    |
| CRP (pg/ml)            | 20 $\pm$ 9.5 | ND                        | 26 $\pm$ 8    | ND                        | 51 $\pm$ 7     |
| mIL6 (ng/ml)           | 16 $\pm$ 6   | 15.4 $\pm$ 9              |               |                           |                |
| hIL6 (ng/ml)           | ND           | 1150 $\pm$ 24             |               |                           |                |
| SAA (ng/ml)            | 13.5 $\pm$ 2 | 16 $\pm$ 4                |               |                           |                |
| IGF1 (ng/ml)           | 266 $\pm$ 15 | 234 $\pm$ 24              |               |                           |                |
| Corticosterone (ng/ml) | 0.2          | 0.6                       |               |                           |                |

Human and mouse IL6 levels were measured by ELISA kit from the serum of random fed mice. Levels of TNF $\alpha$ , INF $\gamma$ , IL10, IL1 and CRP were measured using Beadlyte mouse multi-cytokine beadmaster kit. Monocyte chemoattractant protein 1 (MCP1), adiponectin and resistin were measured using adipokine-plex kit. SAA levels were measured by Elisa kit from the serum of random fed mice on the regular diet. IGF-1 and corticosterone levels were measured by radio-immunoassay ( $n=10$  from each genotype, 16-week-old mice), BL/6J-*ob/ob* obese mice were used as control ND, non detectable (detection levels <7 pg/ml)
