# Supplementary material for: Human IL6 enhances leptin action in mice
Source: Springer Nature journal article supplement (doi:10.1007/s00125-009-1580-8), 2009-11-09
Supplement: MOESM2 [file 8088840]

## Electronic supplementary material

**ESM Table 2** Blood cells as percentage of the total cell numbers in wild-type and *hIL6<sup>tg</sup>* mice

| <b>Blood cell type</b> | <b>Wild-type (%)</b> | <b><i>hIL6<sup>tg</sup></i> (%)</b> |
|------------------------|----------------------|-------------------------------------|
| Lymphocytes            | 70.4                 | 72.4                                |
| Neutrophils            | 20.7                 | 20.6                                |
| Basophils              | 3.7                  | 1.7                                 |
| Monocytes              | 5.1                  | 5.1                                 |

Differential numbers of monocytes, neutrophils, monocytes and lymphocytes were determined on blood smears

Results are expressed as percentage of total cell number ( $n=7$  from each genotype)
