# Supplementary material for: Human IL6 enhances leptin action in mice
Source: Springer Nature journal article supplement (doi:10.1007/s00125-009-1580-8), 2009-11-09
Supplement: MOESM3 [file 8088840]

### Electronic supplementary material

**ESM Table 3** Quantitative RT-PCR of target inflammatory molecules implicated in inflammatory responses within the central nervous system

| <b>Marker</b> | <b>Wild-type</b> | <b>hIL6<sup>tg</sup></b> |
|---------------|------------------|--------------------------|
| <i>Ccl2</i>   | 0.3±0.1          | 0.4±0.2                  |
| <i>Ccl3</i>   | 0.1±0.05         | 0.2±0.15                 |
| <i>Tnfα</i>   | 0.9±0.5          | 0.8±0.3                  |
| <i>Tgfβ1</i>  | 0.95±0.2         | 0.75±0.1                 |
| <i>Il2</i>    | 0.6±0.05         | 0.7±0.2                  |
| <i>Il6</i>    | 0.1±0.05         | 0.15±0.02                |
| <i>Il1α</i>   | 0.1±0.02         | 0.1±0.05                 |
| <i>Il1β</i>   | 0.02±0.003       | 0.05±0.005               |
| <i>Cd4</i>    | 0.5±0.1          | 0.7±0.3                  |
| <i>Cd8</i>    | 0.8±0.2          | 0.9±0.1                  |

Target molecules include cytokines, chemokines and cell adhesion molecules

Quantitative RT-PCR was performed to determine levels of target molecules in brain tissues of wild-type and hIL6<sup>tg</sup> mice (*n*=3 from each genotype)

Levels of brain mRNA were normalised to β-actin

All analysed transcripts were unchanged in the brains of wild-type and hIL6<sup>tg</sup> mice
